# Supplementary material for: The Impact of Short-Term Outdoor Air Pollution on Clinical Status and Prognosis of Hospitalized Patients with Coronary Artery Disease Treated with Percutaneous Coronary Intervention
Source: MDPI journal article supplement (doi:10.3390/jcm11030484), 2022-01-18
Supplement: s1 [file s1]

**Table S1.** The influence of elevated concentration of air pollutants on in-hospital outcomes in study groups.

|                |     | PM10 |           |          | SO <sub>2</sub> |           |          | NO   |           |          | NO <sub>2</sub> |           |          | O <sub>3</sub> |           |          |
|----------------|-----|------|-----------|----------|-----------------|-----------|----------|------|-----------|----------|-----------------|-----------|----------|----------------|-----------|----------|
|                |     | OR   | 95% CI    | <i>p</i> | OR              | 95% CI    | <i>p</i> | OR   | 95% CI    | <i>p</i> | OR              | 95% CI    | <i>p</i> | OR             | 95% CI    | <i>p</i> |
| Death          | CCS | 1.32 | 0.58–3.01 | 0.51     | 0.87            | 0.34–2.17 | 0.77     | 1.03 | 0.45–2.36 | 0.95     | 0.68            | 0.26–1.80 | 0.44     | 0.47           | 0.16–1.34 | 0.16     |
|                | ACS | 0.97 | 0.71–1.32 | 0.84     | 1.05            | 0.71–1.55 | 0.81     | 0.75 | 0.50–1.14 | 0.18     | 0.88            | 0.59–1.31 | 0.52     | 0.83           | 0.55–1.26 | 0.39     |
| MI             | CCS | 0.97 | 0.39–2.42 | 0.95     | 0.94            | 0.34–2.57 | 0.90     | 0.31 | 0.07–1.31 | 0.11     | 0.70            | 0.23–2.07 | 0.51     | 0.44           | 0.13–1.50 | 0.19     |
|                | ACS | 1.15 | 0.65–2.03 | 0.63     | 1.03            | 0.58–1.83 | 0.92     | 0.93 | 0.50–1.71 | 0.80     | 0.82            | 0.44–1.53 | 0.54     | 1.24           | 0.69–2.21 | 0.47     |
| Cardiac arrest | CCS | 0.98 | 0.40–2.41 | 0.96     | 0.94            | 0.40–2.21 | 0.90     | 0.77 | 0.33–1.76 | 0.53     | 0.65            | 0.27–1.56 | 0.33     | 0.47           | 0.18–1.20 | 0.11     |
|                | ACS | 1.01 | 0.85–1.20 | 0.90     | 1.06            | 0.81–1.48 | 0.55     | 0.84 | 0.62–1.16 | 0.29     | 1.08            | 0.81–1.46 | 0.59     | 0.96           | 0.71–1.29 | 0.77     |

Abbreviations: ACS, acute coronary syndrome; CCS, chronic coronary syndrome; MI, myocardial infarction; NO, nitrogen monoxide; NO<sub>2</sub>, nitrogen dioxide; O<sub>3</sub>, daily maximum of 8-hour mean of ozone; PM10, particulate matter with aerodynamic diameter <10 µm; SO<sub>2</sub>, sulphur dioxide.
